# Supplementary material
Source: HighWire-hosted journal article supplement (http://molpharm.aspetjournals.org/highwire/filestream/77414/field_highwire_adjunct_files/0/supplemental_97402.pdf)
Supplement: supplemental_97402.pdf [file supplemental_97402.pdf]

## Supplemental Figure S1

### Activating and inhibitory functions of WNT/ $\beta$ -catenin in the induction of cytochromes P450 by nuclear receptors in HepaRG cells

M. Thomas, C. Bayha, S. Vetter, U. Hofmann, M. Schwarz, Ulrich M. Zanger, A. Braeuning

Molecular Pharmacology

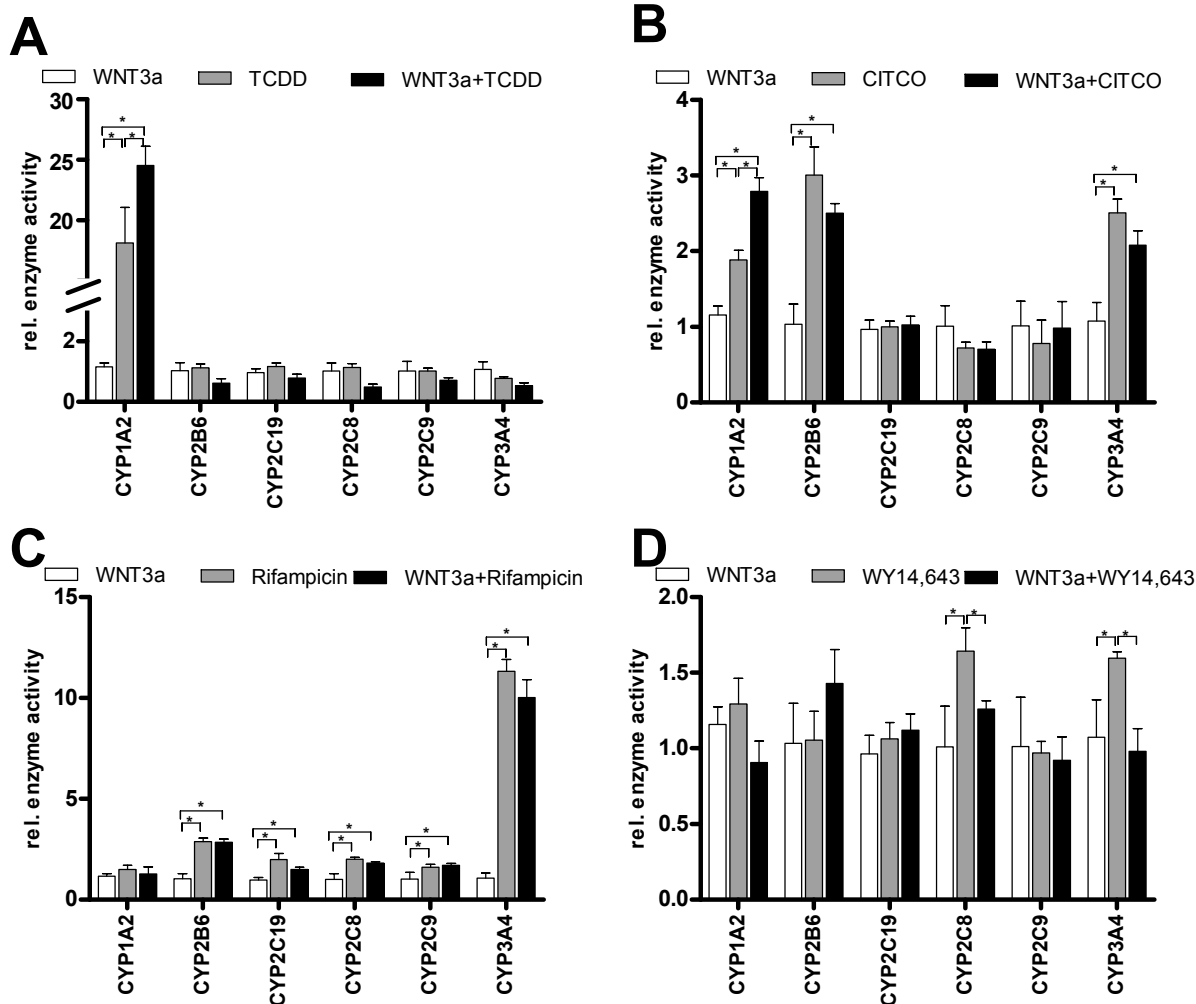

Supplemental Fig. S1. Activity of P450 enzymes during ligand-activated induction of nuclear receptors in combination WNT pathway activation. Enzyme activities measured by LC-MS/MS cocktail assay in the culture supernatants of HepaRG cells following WNT/ $\beta$ -catenin pathway activation (WNT3a, white bars) or treatment with 10nM of AhR agonist TCDD alone (A), 5 $\mu$ M of CAR agonist, CITCO (B), 10 $\mu$ M of PXR agonist, Rifampicin (C) or 100 $\mu$ M of PPAR $\alpha$  agonist, WY14,643 (D) (corresponding light-grey bars on each panel) or in combination with WNT3a treatment (black bars on each panel). Activities measured: CYP1A2, phenacetin O-deethylation; CYP2B6, bupropion 4-hydroxylation; CYP2C8, amodiaquine N-desethylation; CYP2C9, tolbutamide 4'-hydroxylation; CYP2C19, S-mephenytoin 4'-hydroxylation; CYP2D6, propafenone 5-hydroxylation; CYP3A4, atorvastatin o-hydroxylation. Mean data of at least two independent experiments measured in triplicates are represented. Statistical significance for in comparison to vehicle is indicated by \* ( $p < 0.05$ , paired t-test).

## Supplemental Figure S2

### Activating and inhibitory functions of WNT/ $\beta$ -catenin in the induction of cytochromes P450 by nuclear receptors in HepaRG cells

M. Thomas, C. Bayha, S. Vetter, U. Hofmann, M. Schwarz, Ulrich M. Zanger, A. Braeuning

Molecular Pharmacology

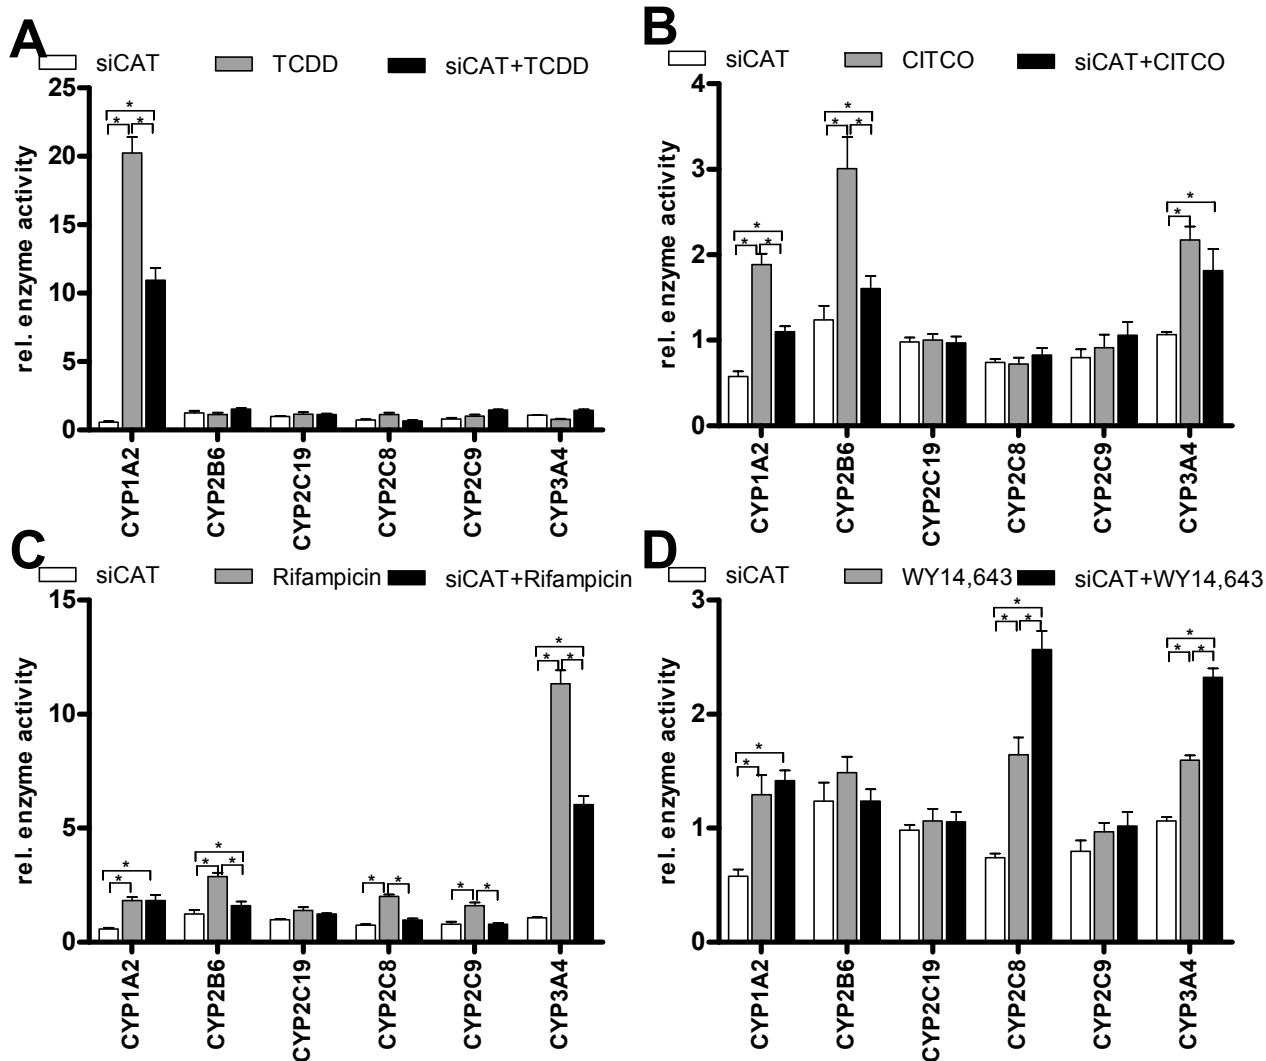

Supplemental Fig. S2. Activity of P450 enzymes during ligand-activated induction of nuclear receptors in combination with  $\beta$ -catenin knock-down. Enzyme activities measured by LC-MS/MS cocktail assay in the culture supernatants of HepaRG cells following  $\beta$ -catenin knock-down (siCAT, white bars) or treatment with 10nM of AhR agonist TCDD alone (A), 5 $\mu$ M of CAR agonist, CITCO (B), 10 $\mu$ M of PXR agonist, Rifampicin (C) or 100 $\mu$ M of PPAR $\alpha$  agonist, WY14,643 (D) (corresponding light-grey bars on each panel) or in combination with siCAT treatment (black bars on each panel). Activities measured: CYP1A2, phenacetin O-deethylation; CYP2B6, bupropion 4-hydroxylation; CYP2C8, amodiaquine N-desethylation; CYP2C9, tolbutamide 4'-hydroxylation; CYP2C19, S-mephenytoin 4'-hydroxylation; CYP2D6, propafenone 5-hydroxylation; CYP3A4, atorvastatin o-hydroxylation. Mean data of at least two independent experiments measured in triplicates are represented. Statistical significance for in comparison to vehicle is indicated by \* ( $p < 0.05$ , paired t-test).
